# Supplementary material for: Insertion of the Liquid Crystal 5CB into Monovacancy Graphene
Source: MDPI journal article supplement (doi:10.3390/molecules27051664), 2022-03-03
Supplement: s1 [file s1]

## Supplementary Material for

Article

# Insertion of the Liquid Crystal 5CB into Monovacancy Graphene

Paul A. Brown, Jakub Kołacz, Sean A. Fischer, Christopher M. Spillmann and Daniel Gunlycke \*

U.S. Naval Research Laboratory, Washington DC 20375, USA

\* Correspondence: daniel.gunlycke@nrl.navy.mil

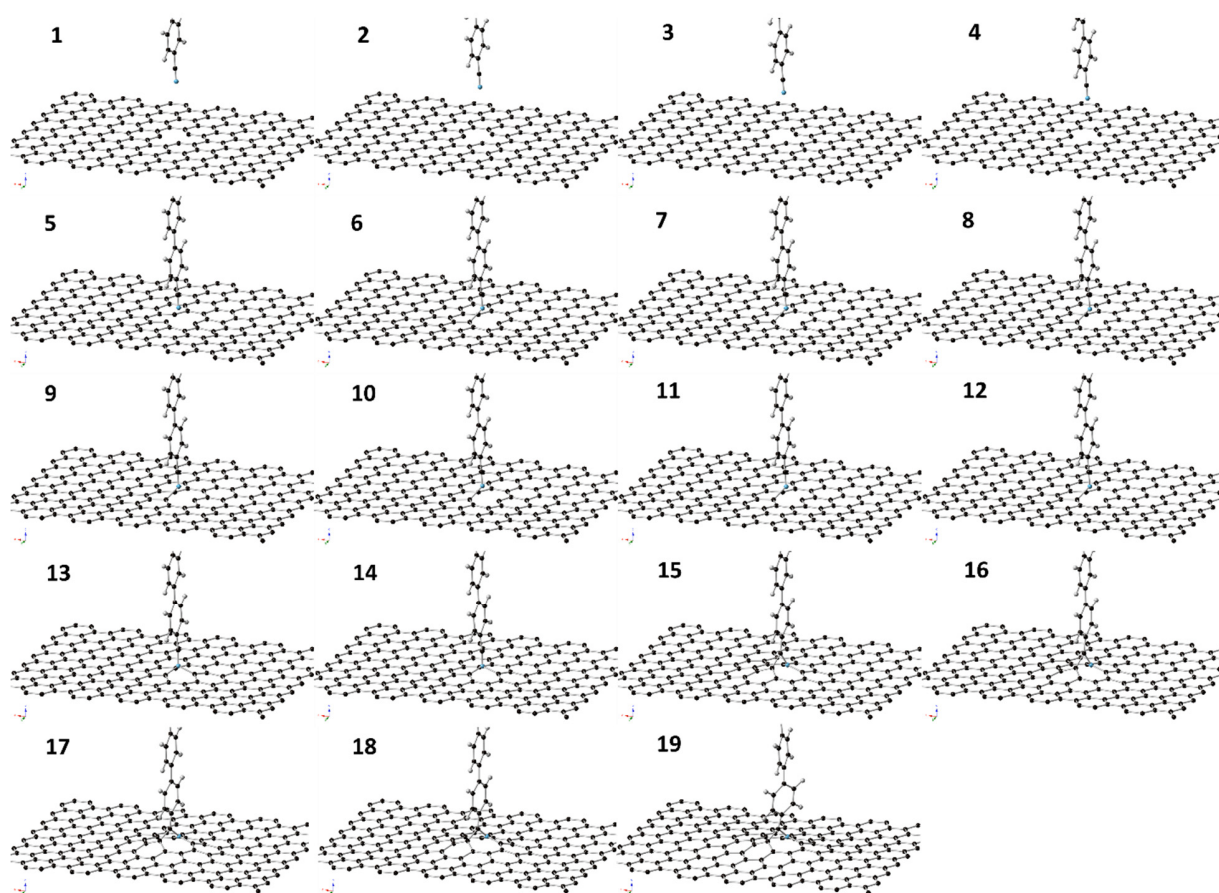

Figure S1. Atomic structures for the 19 reaction steps generated by the nudge elastic band method for the process of chemical insertion of 4-cyan-4'-pentylbiphenyl (5CB) into a graphene monovacancy.

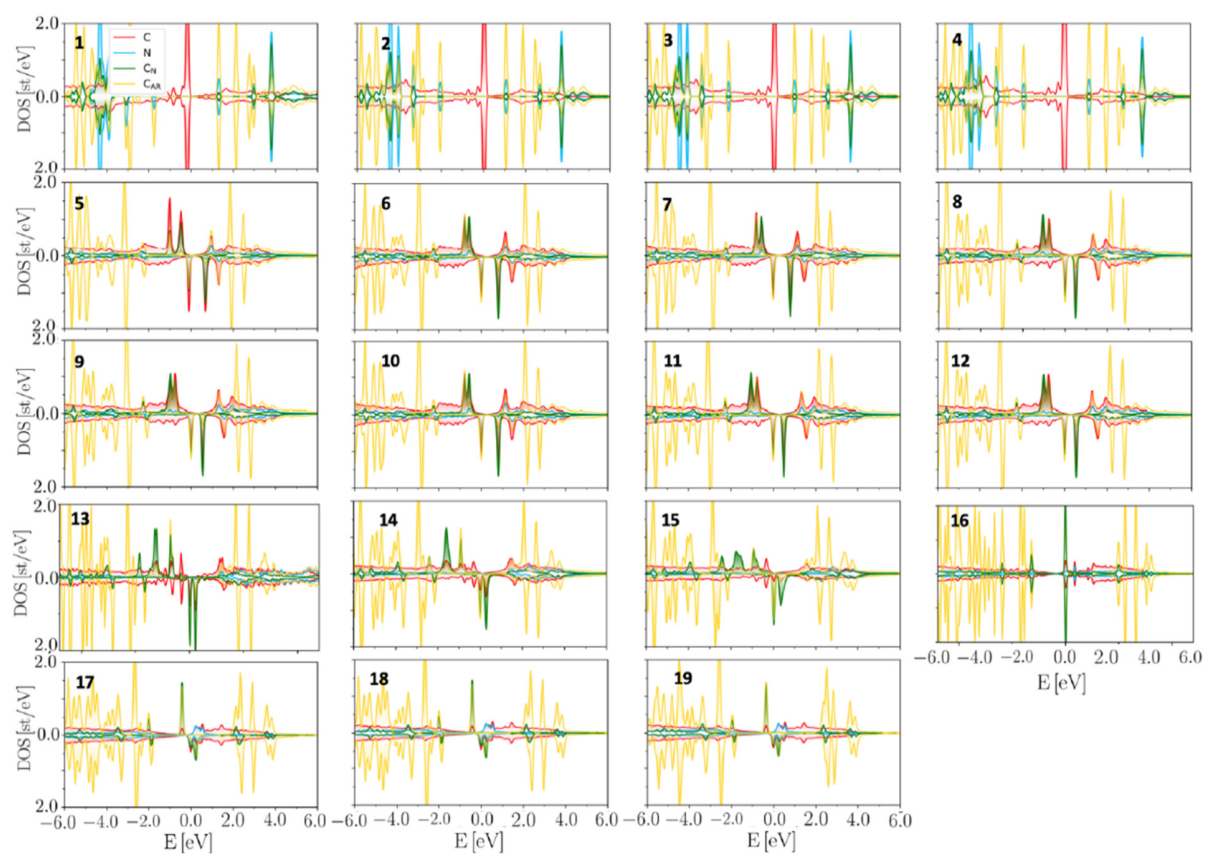

Figure S2. The partial densities of states (PDOS) for the 19 reaction steps generated by the nudge elastic band (NEB) method for the process of 4-cyan-4'-pentylbiphenyl (5CB) into a graphene monovacancy.
